# 1 **Conformational states control Lck switching between free and** 2 **confined diffusion modes in T cells**

3 **Geva Hilzenrat<sup>1,2</sup>, Elvis Pandžić<sup>3</sup>, Zhengmin Yang<sup>1,2</sup>, Daniel J. Nieves<sup>1,2</sup>, Jesse**  
4 **Goyette<sup>1,2</sup>, Jérémie Rossy<sup>4</sup>, Katharina Gaus<sup>1,2\*</sup>**

5  
6 *<sup>1</sup>EMBL Australia Node in Single Molecule Science, School of Medical Sciences, University of*  
7 *New South Wales, Sydney, Australia*

8 *<sup>2</sup>ARC Centre of Excellence in Advanced Molecular Imaging, University of New South Wales,*  
9 *Sydney, Australia*

10 *<sup>3</sup>BioMedical Imaging Facility, Mark Wainwright Analytical Centre, University of New South*  
11 *Wales, Sydney, Australia*

12 *<sup>4</sup>Biotechnology Institute Thurgau, University of Konstanz, Kreuzlingen, Switzerland*

13  
14 \*Corresponding author: [k.gaus@unsw.edu.au](mailto:k.gaus@unsw.edu.au)

## 17 **Abstract**

18 T cell receptor (TCR) phosphorylation by Lck is an essential step in T cell activation. It is  
19 known the conformational states of Lck control enzymatic activity; however, the underlying  
20 principles of how Lck finds its substrate in the plasma membrane remain elusive. Here,  
21 single-particle tracking is paired with photoactivatable localization microscopy (sptPALM) to  
22 observe the diffusive modes of Lck in the plasma membrane. Individual Lck molecules  
23 switched between free and confined diffusion in resting and stimulated T cells.  
24 Conformational state, but not partitioning into membrane domains, caused Lck confinement  
25 as open conformation Lck was more confined than closed. Further confinement of kinase-  
26 dead versions of Lck suggests that Lck interacts with open active Lck to cause confinement,  
27 irrespectively of kinase activity. Our data supports a model that confined diffusion of open  
28 Lck results in high local phosphorylation rates and closed Lck diffuses freely to enable wide-  
29 range scanning of the plasma membrane.

30 T cell signaling is a tightly controlled process involving both simultaneous and sequential  
31 spatiotemporal events, involving membrane remodeling and redistribution of key signaling  
32 proteins<sup>1,2</sup>. Engagement of the T cell receptor (TCR) with an antigenic pMHC on the surface  
33 of an antigen-presenting cell (APC) leads to the formation of immunological synapses<sup>3</sup> and  
34 initiates downstream signaling events that lead to T cell activation<sup>4</sup>. The Src family kinase  
35 Lck plays a crucial role in the signaling cascade. TCR engagement results in the membrane  
36 release<sup>5</sup> and phosphorylation of the immunoreceptor tyrosine-based motifs (ITAMs) located  
37 in the cytoplasmic tails of the CD3 $\zeta$  chain by Lck<sup>6</sup>. Phosphorylated sites on the TCR-CD3  
38 complex become docking sites for the zeta chain-associated protein kinase 70 (ZAP70), that  
39 is further phosphorylated by Lck<sup>7</sup> before recruiting other proteins in the signaling cascade  
40 that are necessary for complete T cell activation.

41 The role of Lck in T cell activation as a signaling regulator is of particular interest due to its  
42 dynamic characteristics. Lck is a 56 kDa protein comprised of a Src homology (SH) 4 domain  
43 at the N-terminus, followed by a unique domain, an SH3 domain, an SH2 domain, a kinase  
44 domain and short C-terminal tail. Lck is anchored to the plasma membrane through its SH4  
45 domain via post-translational acylation on three specific sites: a myristoylated Gly2<sup>8</sup> and  
46 palmitoylated Cys3 and Cys5. The latter two are crucial for membrane binding and biological  
47 activity, enabling Lck diffusion in the inner leaflet of the plasma membrane and its  
48 recruitment to the immunological synapse<sup>9</sup>. The unique domain interacts with the CD3 $\epsilon$   
49 subunit in the TCR-CD3 complex<sup>10</sup> as well as the co-receptors CD4 and CD8<sup>11</sup> via zinc-  
50 mediated bonds. However, Lck does not require the co-receptors for recruitment to the  
51 immunological synapse or for TCR triggering<sup>12</sup>, suggesting that freely diffusing Lck is  
52 sufficient for T cell activation.

53 Lck conformation is regulated by the phosphorylation of two tyrosine residues: Tyr<sup>394</sup>, where  
54 phosphorylation increases Lck activity, and Tyr<sup>505</sup>, whose phosphorylation reduces Lck

55 activity<sup>13,14</sup>. Intramolecular interactions between the phosphorylated Tyr<sup>505</sup> (pTyr<sup>505</sup>) and the  
56 SH3 and SH2 domains cause rearrangements that keep Lck in a closed, inactive conformation  
57<sup>15,16</sup>. When dephosphorylated by CD45, Lck exists in an open, primed conformation. When  
58 Tyr<sup>394</sup> is trans-autophosphorylated<sup>14</sup>, rearrangements in the activation loop stabilize the  
59 active conformation<sup>17</sup>. Lck's diffusion behavior<sup>18</sup> and conformational state<sup>19,20</sup> are thought  
60 to be regulated by the activation state of the cell. The conformational state also influences  
61 Lck clustering<sup>21</sup>. This means that not only does Lck conformational state regulate Lck  
62 enzymatic activity but also aids in its diffusive search strategy.

63 Whether Lck becomes 'active', i.e., converted into the open conformation upon TCR  
64 engagement, has been controversial. There is evidence of global changes in relative  
65 populations of closed and open Lck in resting *versus* stimulated T cells<sup>19,20</sup>. These studies  
66 propose that Lck undergoes conformational changes upon T cell activation, driving it from its  
67 closed state to an open state, therefore enhancing its activity. Using biochemical analyses,  
68 conformational heterogeneity was observed in resting and stimulated T cells<sup>22</sup>, suggesting a  
69 "standby-model" in which ~40% of Lck is in the open conformation in both resting and  
70 stimulated T cells. Ballek et al. challenged these observations in a later report that used  
71 different cell lysis conditions<sup>23</sup>. Another study, based on measurements of fluorescence  
72 resonance energy transfer (FRET) between fluorescent proteins fused to the N- and C-  
73 terminals of Lck, concluded there was no significant change in open *versus* closed  
74 populations of Lck even after T cell stimulation<sup>24</sup>. While different papers report different  
75 percentages of open Lck in pre-stimulated cells, constitutively active Lck were also found in  
76 CD8<sup>+</sup> memory T cells and may account for the enhanced sensitivity to antigen in these cells  
77<sup>25</sup>. A pool of active Lck existing prior to T cell stimulation led to the idea that rapid TCR  
78 triggering post receptor engagement may be caused by changes in Lck spatial rearrangements  
79 as opposed to, or in addition to conformational changes. Using single-molecule localization

80 microscopy in fixed cells, we previously showed that Lck distributed differently on the cell  
81 surface depending on its conformational state <sup>21</sup>, with open Lck residing preferentially in  
82 clusters and closed Lck preventing clustering, regardless of the cell's activation state.  
83 However, this study only captured the overall distribution of open or closed Lck and the  
84 movement of Lck clusters, but to understand the search strategy of the membrane-bound  
85 kinase the dynamic behavior of individual molecules need to be taken into account.

86 The efficiency of a dual-state search strategies has previously been demonstrated in other  
87 systems <sup>26</sup>. For Lck, such a strategies would entail that individual molecules oscillate between  
88 two distinct states: a confined state that corresponds to high Lck activity and a diffusive state  
89 that enables the kinase to scan the membrane for substrates. Such a dual-state search strategy  
90 may account for the high fidelity of Lck-mediated phosphorylation of the available TCR-CD3  
91 complexes while also retaining high signaling sensitivity when membrane-detached cytosolic  
92 tails of the CD3 complex are limited. The former would be mediated by the high enzymatic  
93 activity in Lck clusters while the high level of diffusion of Lck in the closed state would  
94 enable the latter.

95 The dynamic behavior of Lck was previously mapped with single particle tracking (SPT) in  
96 live cells, revealing, for example, the differences in Lck diffusion in stimulated *versus* resting  
97 T cells and the formation of microclusters, but without linking dynamics to conformational  
98 states <sup>18,27</sup>. Overall changes in diffusion constants were observed, as well as segregation into  
99 different confinement zones, attributed to actin and other proteins compartmentalizing the  
100 membrane <sup>27,28</sup> or to the formation of membrane microdomains <sup>18</sup>. Recently, Lck  
101 compartmentalization upon TCR stimulation was attributed to the formation of close-contact  
102 zones between the T cell membrane and the stimulating surface, possibly because of  
103 exclusion of CD45, in line with the kinetic segregation model <sup>29</sup>. These works, however, did  
104 not take into account the conformational change in Lck.

105 In the current study, we utilize SPT using photoactivatable localization microscopy  
106 (sptPALM)<sup>30</sup> as a tool to study the diffusion of wild type (WT) and mutated Lck, lacking the  
107 tyrosine residues on positions 394 and 505, to measure the dynamics of the closed and open  
108 forms, respectively<sup>19,20</sup>. Lck variants were tagged with photoactivatable monomeric cherry  
109 (PAmCherry)<sup>31</sup>, expressed in Jurkats 1.6E cells and imaged in resting and activating  
110 conditions. Single trajectories were extracted and analyzed in order to find periods when the  
111 proteins underwent confined diffusion and the fraction of confined versus free proteins was  
112 determined<sup>32</sup>. Measurements of different Lck variants showed that conformation has a key  
113 role in Lck's substrate search strategy, with the open form dwelling more in confinements  
114 compared to the closed form. Further, we provide evidence of Lck-Lck interaction in the  
115 open conformation in stimulated T cells. Taken together, the data suggest that Lck  
116 continuously switched between open and closed states, which is likely to determine the  
117 probability of productive encounters between Lck and its substrates.

## 118 **Results**

### 119 **Identification of free and confined states of Lck in live T cells**

120 In order to characterize the diffusion patterns of Lck, we applied single particle tracking on  
121 image sequences from different experimental conditions and decomposed each trajectory into  
122 free and confined segments. Jurkat E6.1 cells were transfected with either wild-type Lck  
123 (wtLck) fused to PAmCherry (wtLck-PAmCherry) or a truncated construct of Lck containing  
124 only the first ten amino acids that are responsible for Lck anchoring to the membrane (Lck10-  
125 PAmCherry). T cells were stimulated for ~5 minutes at 37°C on a coverslip coated with anti-  
126 CD3 and anti-CD28 antibodies and imaged either in live-cell conditions or after chemical  
127 fixation. In each experiment we acquired 10,000 frames with an 18 ms exposure for the  
128 duration of ~197 s. Imaging was done while continuously photo-activating and exciting the

129 fluorophores. Trajectories shorter than 15 frames and immobile particles (particles with a low  
130 RMSD, as described in the Methods section) were excluded from analysis.

131 We decomposed trajectories by adopting a previously described post-tracking analysis<sup>32</sup>.  
132 Briefly, every trajectory is first fragmented into overlapping windows. For each window, the  
133 normalized variance of the location of the particle is calculated as a measure of the level of  
134 confinement,  $L_{Conf}$ , according to:

$$135 \quad (1) \quad L_{Conf} = \frac{D_{free} \times W \times t_w}{var(r)}$$

136 where  $D_{free}$  is the diffusion coefficient of freely diffusing Lck in  $\mu\text{m}^2 \text{sec}^{-1}$ ,  $W$  is the window  
137 size in frames,  $t_w$  is the temporal length of the window in seconds and  $var(r)$  is the variance  
138 in  $\mu\text{m}^2$ . We chose the diffusion coefficient of Lck10-PAmCherry as the value for  $D_{free}$  for all  
139 versions of Lck as Lck10 is membrane anchored but does not interact with other proteins. We  
140 then defined a threshold of  $L_{Conf}$  above which particles are considered confined. For this  
141 threshold, we chose the most abundant  $L_{Conf}$  value for wtLck-PAmCherry in stimulated T  
142 cells, following the procedure published previously<sup>32</sup> (dotted line in Fig. 1A). This threshold  
143 was suitable because the majority of values for Lck10-PAmCherry in resting cells were  
144 below this threshold and all values for wtLck-PAmCherry in fixed cells were above the  
145 threshold (Fig. 1A). In order to ensure that Lck molecules were in fact confined, rather than  
146 just temporarily slowing down, we only regarded a molecule as confined if it has an  $L_{Conf}$   
147 value above the threshold for three or more consecutive windows. Trajectories were then  
148 segmented into confined and free periods (Fig. 1B), depending on whether  $L_{Conf}$  was above or  
149 below the threshold (Fig. 1C). From this analysis it was evident that molecules that diffused  
150 slowly for 3 or more consecutive states were found to be confined (Fig. S1). This analysis  
151 was applied to all trajectories recorded in a cell (Fig. 1D). As is evident from this sptPALM  
152 analysis, individual wtLck-PAmCherry molecules in live cells switched between free and

153 confined diffusive states (Fig. 1D) while in fixed cells, only confined or immobile molecules  
154 were observed (Fig. 1D).

### 155 **Wild-type Lck was more confined in stimulated than resting T cells**

156 Previous studies provided evidence that T cell activation decreases the overall diffusion of  
157 Lck<sup>18,27</sup>. In our experiments, resting T cell data was generated by placing T cells expressing  
158 wtLck-PAmCherry onto coverslips coated with anti-CD90 antibodies. This resulted in good T  
159 cell adhesion, but not TCR signaling or T cell activation<sup>33</sup>. Our measurements confirmed the  
160 decrease in diffusion (Fig 2A; Movie S1: resting - right, stimulated - left), with diffusion  
161 coefficients of  $1.16 \mu\text{m}^2 \text{s}^{-1}$  (1.15-1.17) to  $0.69 \mu\text{m}^2 \text{s}^{-1}$  (0.68-0.7) for resting and stimulated  
162 cells, respectively (Fig. 2A, Fig. S2a; Movie S1). We wanted to assess whether this  
163 slowdown is caused by enhanced spatial compartmentalization in the membrane. Thus, we  
164 conducted the  $L_{\text{Conf}}$  analysis for wtLck-PAmCherry in resting and stimulated cells. When  
165 comparing the  $L_{\text{Conf}}$  histogram of wtLck in stimulated T cells (Fig. 2B, blue) *versus* resting T  
166 cells (Fig. 2B, orange), it is noticeable that the values in activated cells are shifted to higher  
167 values, resulting in a mean  $L_{\text{Conf}}$  value of 32.9 in stimulated cells and 29.1 in resting cells.

168 Next we examined whether the decrease in local displacement variance is due to a  
169 redistribution of wtLck-PAmCherry into confinements that would result in an increase in the  
170 number of consecutive steps that fall above the  $L_{\text{Conf}}$  threshold value. Thus, we segmented the  
171 total video into segments of five frames (Fig. S3), in which we asked how many particles, out  
172 of the total number of particles imaged, were confined. Histograms obtained for stimulated  
173 and non-stimulated cells (Fig. 2C) were collected. There was a clear difference in peak value  
174 for the two populations as well as a larger tail of high values for wtLck-PAmCherry in  
175 stimulated cells. As a consequence, the populations were statistically different (Fig. 2C) when  
176 tested against the null hypothesis according to which the samples are drawn from the same

177 population, using the rank sum test, with different medians and non-overlapping 95%  
178 confidence intervals with the values of 27.27% (26.67-27.78) and 22.22% (21.82-22.73) for  
179 stimulated and resting cells, respectively. The percentage of confined wtLck-PAmCherry  
180 were 30.97% (30.63-31.3) and 26.4% (26.14-26.68) in stimulated and resting cells,  
181 respectively.

182 Overall, these results show that wtLck-PAmCherry diffused slower in stimulated cells  
183 compared to resting cells, suggesting that in addition to a global reduction in diffusion, a  
184 redistribution of Lck into confinements had occurred. These results are in agreement with an  
185 increase in wtLck-PAmCherry clustering in fixed stimulated *versus* fixed resting T cells <sup>21</sup>.

#### 186 **Membrane anchoring alone is not contributing to Lck confinement**

187 Lck confinement may be attributed to the formation of membrane domains, i.e., changes in  
188 membrane order, as a result of TCR triggering <sup>34</sup>. If that is the case, a truncated version of  
189 Lck, Lck10, that includes the first ten amino acids that are responsible to Lck anchoring to  
190 the membrane as it contains the post-translational lipid modifications, is expected to  
191 experience the same slowdown and confinement as full-length Lck. However, we did not  
192 observe such a scenario (Fig. 3A; Movie S2), as the diffusion coefficients found for Lck10-  
193 PAmCherry in stimulating and resting conditions remained high (Fig. S2b). The overall level  
194 of confinement of Lck10-PAmCherry was almost identical for both resting and stimulated  
195 cells, with a peak  $L_{Conf}$  value of 7.2 and 7.74, respectively (Fig. 3B). These values were  
196 significantly different from the ones found for wtLck-PAmCherry, with most of the  
197 probability function having a value below the threshold described above. A histogram of  
198 confinement events (Fig. 3C) shows comparable peak values for both stimulated and resting  
199 cells. No statistically significant difference was found between the two samples (Fig. 3C, top  
200 panel), as shown by median of 9.62% (9.43-9.8) and 9.68% (9.52-10.00) for Lck10-



201 PAmCherry expressed in stimulated and resting cells, respectively. Further, the mean fraction  
202 of confined particles was slightly higher in resting cells, with values of 13.96% (13.74-14.18)  
203 and 14.73% (14.45-15.00) for stimulated and resting cells, respectively. These values were  
204 lower than those found for wtLck-PAmCherry, suggesting Lck10-PAmCherry was far less  
205 confined than wtLck-PAmCherry, even in stimulated cells.

206 Taken together, the data strongly suggest that the increased confinement observed for full-  
207 length wtLck-PAmCherry was not due to global changes in membrane organization or  
208 membrane domains<sup>18</sup> as confinement of Lck10 in resting and stimulated T cells was similar.

### 209 **Open Lck is highly confined in stimulated and resting cells**

210 Previously, we reported that Lck clustering was regulated by the kinase's conformational  
211 state<sup>21</sup>. We thus quantified the influence of conformation on confinement of Lck in live cells.  
212 First, we introduced a Tyrosine-to-Phenylalanine mutation at position 505 in Lck (Lck<sup>Y505F</sup>).  
213 The mutation prevents the binding of Lck pTyr<sup>505</sup> to its own SH2 domain. This mutation is  
214 well known as 'constitutively open'<sup>19-21,24,35</sup> and 'hyperactive'<sup>13</sup>. An overall change in the  
215 diffusion constants due to cell activation (Fig. 4A; Movie S3) was observed, with values of  
216  $0.65 \mu\text{m}^2 \text{s}^{-1}$  (0.64-0.66) and  $0.95 \mu\text{m}^2 \text{s}^{-1}$  (0.94-0.96) in stimulated and resting cells,  
217 respectively (Fig. S2c). Further,  $L_{\text{Conf}}$  values for Lck<sup>Y505F</sup>-PAmCherry were higher than that  
218 of wtLck-PAmCherry (Fig. 4B), with peak values of 39.28 and 42.53 in stimulated and  
219 resting cells, respectively, with <50% of  $\log_{10}(L_{\text{Conf}})$  events above the confinement threshold.  
220 In contrast to wtLck-PAmCherry, the  $L_{\text{Conf}}$  distributions of Lck<sup>Y505F</sup>-PAmCherry were similar  
221 in resting and stimulated T cells. This similarity was also observed in the histograms of the  
222 confined fractions (Fig. 4C), with a large population of Lck<sup>Y505F</sup> molecules falling into the  
223 right tail of the distribution. Importantly, unlike in the corresponding data for wtLck-  
224 PAmCherry, these values were not significantly different from each other (Fig. 4C, top), with

225 median values and overlapping 95% confidence interval of 26.55% (26.32-26.67) and  
226 26.39% (26.14-26.67) for stimulated and resting cells, respectively. The means of Lck<sup>Y505</sup>  
227 were 29.85% (29.59-30.11) and 29.97% (29.74-30.22) in stimulated and resting cells,  
228 respectively.

229 These data show that when Lck is locked in the open state, it is also driven into a more  
230 confined diffusive behavior, which is comparable with wtLck-PAmCherry in stimulated cells  
231 (Fig. S4). Although the diffusion coefficient found for Lck<sup>Y505F</sup>-PAmCherry is lower, in  
232 terms of confinement, open Lck was insensitive to the T cell activation with Lck<sup>Y505F</sup>-  
233 PAmCherry confinement levels being similar in both stimulated and resting cells. This  
234 indicates that Lck confinement is driven by the open conformation of the kinase and supports  
235 that a higher proportion of Lck is in the open conformation in stimulated T cells<sup>19,20,36</sup>.

### 236 **Closed Lck is as confined as wild-type Lck in resting cells**

237 To further investigate the hypothesis that Lck conformation regulates Lck diffusive behavior,  
238 we expressed a closed form of Lck in Jurkat cells. A mutation in position 394 converting a  
239 tyrosine into phenylalanine (Lck<sup>Y394F</sup>) prevents the formation of the activation loop and  
240 results in reduced-activity<sup>14</sup> or an inactive Lck<sup>13</sup> because of the hyper-phosphorylated tyr<sup>505</sup>  
241<sup>22</sup> that constitutively closes the enzyme<sup>19</sup>.

242 As with the wtLck and Lck<sup>Y505F</sup>, Lck<sup>Y394F</sup>-PAmCherry did undergo a decrease in diffusion  
243 coefficient due to stimulation (Fig.5A; Movie S4), from 1.24  $\mu\text{m}^2 \text{s}^{-1}$  (1.22-1.26) in resting  
244 cells to 0.88  $\mu\text{m}^2 \text{s}^{-1}$  (0.87-0.89) in stimulated cells (Fig. S2d). We applied the same  
245 sptPALM analysis to Lck<sup>Y394F</sup>-PAmCherry and lower  $L_{\text{Conf}}$  values were obtained with peak  
246 values of 32.93 and 30.36 in stimulated and resting cells, respectively (Fig. 5B). Histograms  
247 of the fraction of confined Lck<sup>Y394F</sup>-PAmCherry showed the populations were skewed  
248 towards lower values (Fig. 5C). Similarly to Lck<sup>Y505F</sup>-PAmCherry, Lck<sup>Y394F</sup>-PAmCherry

249 showed no statistically significant difference between stimulated and resting cells (Fig. 5C,  
250 top panel) and medians of 22.22% (21.88-22.58) and 21.95% (21.43-22.22) for Lck<sup>Y394F</sup>-  
251 PAmCherry in stimulated and resting cells, respectively. The mean confinement fractions  
252 were 26.09% (25.85-26.33) and 26.24% (25.92-26.55) for Lck<sup>Y394F</sup>-PAmCherry in stimulated  
253 and resting cells, respectively.

254 The confinement fraction values we found for the closed Lck were smaller than the ones  
255 found for the open Lck (Fig. S4), illustrating the significance conformational states have on  
256 Lck diffusion. Indeed closed Lck has a similar level of confinement as wtLck in resting cells  
257 while open Lck was similarly confined as wtLck in activated cells (Fig. S4). Thus, the data  
258 confirms that confinements are regulated by the conformational state of Lck with open Lck  
259 being more confined and closed Lck being less confined.

#### 260 **Lck self-associates with other Lcks, depending on its conformation and activity**

261 An open Lck that is also phosphorylated in Tyrosine 394 is known to be active, while studies  
262 done on Lck<sup>Y505F</sup> showed hyperactivity<sup>13,14</sup>. By expressing a constitutively inactive Lck, we  
263 could assess whether Lck confinement relies on enzymatic activity. We tested an Lck variant  
264 in which the lysine in position 273 in the kinase domain is replaced with Arginine (Lck<sup>K273R</sup>-  
265 PAmCherry, Fig. 6, Fig. S5), which has been shown to render Lck kinase-dead<sup>37</sup>. Different  
266 diffusion coefficients of 0.82  $\mu\text{m}^2 \text{s}^{-1}$  (0.81-0.83) and 1.13  $\mu\text{m}^2 \text{s}^{-1}$  (1.12-1.15) were observed  
267 for Lck<sup>K273R</sup>-PAmCherry in stimulated and resting cells, respectively (Fig. S2e). However,  
268 similar  $L_{\text{Conf}}$  histograms, with values of 34.80 for stimulated and 37.58 for resting cells, were  
269 obtained (Fig. 6B, blue and orange) with no significant difference observed in the fraction of  
270 time spent confined (Fig 6C, blue and orange). Additionally, Lck<sup>K273R</sup>-PAmCherry spent  
271 25.80% (25.56-26.07) and 25.62% (25.38-25.86) of time confined in stimulated and resting  
272 cells, respectively (Fig 6C). Thus, the level of confinement kinase-dead Lck did not depend

273 on the T cell activation status as it did for wtLck (Fig. S5). Assuming that the K273R  
274 mutation disables Lck activation via autophosphorylation, as hypothesized previously<sup>13</sup>, the  
275 finding suggest that confinement of wtLck in stimulated T cells is regulated by Lck  
276 activation.

277 To further test this hypothesis, we expressed a constitutively-open kinase-dead mutant  
278 Lck<sup>K273R, Y505F</sup>-PAmCherry. This mutant had slower diffusion coefficients of  $0.41 \mu\text{m}^2 \text{s}^{-1}$   
279 ( $0.41\text{-}0.42$ ) and  $0.51 \mu\text{m}^2 \text{s}^{-1}$  ( $0.5\text{-}0.51$ ) in stimulated and resting cells, respectively (Fig. 6A;  
280 Fig. S2f; Movie S5), values that were slower than those obtained for Lck<sup>K273R</sup>-PAmCherry  
281 (Fig. S2e, f). Further, Lck<sup>K273R, Y505F</sup>-PAmCherry had higher  $L_{\text{Conf}}$  values in stimulated cells  
282 (Fig. 6C, purple and yellow) compared to resting cells (44.78 and 35.09, respectively).

283 Conducting the same analysis to quantify confinement fractions, we found a large fraction of  
284 kinase-dead mutant in the open conformation was highly confined in stimulated cells (Fig.  
285 6C, purple and yellow). When comparing total trajectories, Lck<sup>K273R, Y505F</sup>-PAmCherry in  
286 stimulated cells was more confined than in resting cells and more than Lck<sup>K273R</sup> in both cell  
287 activation statuses (Fig. S5). These data confirm the conclusion that open, but not necessarily  
288 enzymatically active Lck confined the kinase in distinct zones in the plasma membrane.

289 Lck<sup>K273R, Y505F</sup>-PAmCherry was more confined in stimulated cells (26.97% (26.76-27.18))  
290 than resting cells (23.30% (23.08-23.52)). It is possible that the open, kinase-dead variant of  
291 Lck interacts with endogenous Lck in Jurkat cells that were already shown to be confined in  
292 stimulated cells (Fig. 2). This would suggest that open Lck is confined in activated T cells by  
293 Lck-Lck interaction. Moreover, the lowered confinement for the K273R-Y505F mutant in  
294 resting cells compared to stimulated cells excludes the possibility of confinement due to  
295 increase in hydrodynamic radius of the enzyme (Fig. S5). Taken together, the experiments  
296 with the kinase-dead version of Lck confirmed the finding that it was the open conformation

297 that caused the Lck confinement. Thus it is likely that the enzyme switches between open and  
298 close conformation, which results in a dual-state search strategy where open and active Lck is  
299 confined, and closed and inactive Lck diffuses freely (Fig. 7).

300

## 301 **Discussion**

302 Phosphorylation of the TCR-CD3 complex by the kinase Lck is an essential step in T cell  
303 activation<sup>38</sup>. While it is relatively well documented that the conformational states control  
304 enzymatic activity, how membrane-bound Lck finds and phosphorylates its substrates is not  
305 well understood. For example, the link between phosphorylation state and activity is well  
306 established<sup>39</sup>, as well as some interactions of Lck with other proteins<sup>40-43</sup> and lipids<sup>44</sup>. Most  
307 studies so far have focused on whether or not T cell stimulation results in an ‘activation’ of  
308 Lck itself, i.e., whether there is an overall increase of Lck molecules in the open  
309 conformation and whether a stable pool of open Lck already exists in resting T cells.  
310 However, it is also possible that in the dynamic environment of the inner leaflet of the plasma  
311 membrane, Lck switches between open and closed states, as many other types of enzymes do  
312<sup>45-47</sup>. Utilizing single molecule localization microscopy (SMLM) techniques, our group  
313 showed that open Lck clusters were bigger and denser than closed Lck clusters<sup>21</sup>. In SMLM,  
314 re-excitation of the same molecule can lead to overestimation of clustering<sup>48</sup>. Thus, we  
315 investigated here whether Lck switches between confined and free diffusion modes. By  
316 tracking single Lck molecules, we were indeed able to set a threshold to distinguish a  
317 population that diffuses freely from one that exhibited restricted diffusion. We found that  
318 wild-type Lck (wtLck-PAmCherry) transitioned between free and confined states in both  
319 resting and stimulated T cells, strongly suggesting that the kinase has a sophisticated search  
320 strategy.

321 In a study employing immunofluorescence staining, a pre-existing pool of constitutively  
322 active Lck was used to explain the readiness of Lck to phosphorylate the TCR immediately  
323 after T cell stimulation <sup>22</sup>, while showing no difference in the fraction of open Lck when  
324 comparing stimulated to resting cells. Therefore, it was speculated that Lck undergoes re-  
325 distribution upon T-cell stimulation, while maintaining the same overall fraction of Lck in the  
326 open and closed conformation. By examining the diffusion modes of Lck, as a function of  
327 conformational status, we can provide an alternative explanation of how the kinase can be  
328 efficient at both searching for substrates and phosphorylating the TCR complex. Firstly, we  
329 found that T cell stimulation significantly changed the behavior of wtLck, promoting Lck  
330 molecules to spend more time in confinements, compared to resting cells. Further our results  
331 showed that in resting cells, wtLck behaved like the closed Lck mutant in both activating and  
332 resting conditions. In contrast, in stimulated cells, wtLck demonstrated a diffusion pattern  
333 that was similar to that of the open Lck mutant in both conditions. These observations led us  
334 to the conclusion that T cell activation leads to a higher proportion of open Lck, supporting  
335 the recent findings that were obtained with a fluorescence resonance energy transfer (FRET)  
336 Lck biosensor <sup>19</sup>. Our findings do not exclude the possibility of a pre-existing pool of open  
337 Lck.

338 Comparing the level of confinement of open and closed Lck mutations (Fig. S4) clearly  
339 showed that diffusion behaviour dependent on the conformational state of the enzyme.  
340 Lck<sup>Y394F</sup>-PAmCherry i.e. closed Lck was confined than wtLck-PAmCherry in stimulated  
341 cells and Lck<sup>Y505F</sup>-PAmCherry i.e. open Lck in stimulated and resting cells. Further,  
342 Lck<sup>Y394F</sup>-PAmCherry demonstrated similar confinement to that of wtLck-PAmCherry in  
343 resting cells. The values obtained for the open mutant, both in stimulated and resting cells  
344 were closer to the value that we obtained for wtLck-PAmCherry in stimulating conditions.  
345 Taken together, our data support that notion that the open conformational state of Lck is

346 responsible for Lck confinement and that T cell activation resulted in converting some of the  
347 wtLck molecules into the open state<sup>19,20</sup>.

348 All Lck variants demonstrated some level of confinement in resting conditions. As these  
349 results were obtained by expressing Lck variants in Jurkat cell lines, this confinement may be  
350 an outcome of self-association with endogenous active Lck, and may be related to a pre-  
351 existing pool of opened Lck in resting cells. Other mechanisms such as Lck's SH4 domain  
352 interaction with lipid rafts<sup>49,50</sup> and microdomains<sup>51,52</sup> were previously suggested. Such  
353 scenarios should have, however, also affected Lck10-PAmCherry, as this segment is  
354 responsible for anchoring Lck to the membrane and should have resulted in slower diffusion  
355 in stimulated cells. However this was not the case; similarly to closed Lck (Lck<sup>Y394F</sup>-  
356 PAmCherry) we found no difference in confinement of Lck10-PAmCherry in resting and  
357 stimulated T cells. Further, one may hypothesize that Lck confinement is indirectly related to  
358 membrane domains, by interacting with other proteins that are lipid raft-associated. However,  
359 from our results with open Lck (Lck<sup>Y505F</sup>-PAmCherry) we could not find support for this  
360 idea, as Lck<sup>Y505F</sup> was similarly confined in resting and stimulated cells.

361 The kinase-dead mutant, Lck<sup>K273R</sup>-PAmCherry, was found to be minimally-confined in  
362 resting and stimulated cells. It is possible that the K273R mutation in Lck prevents the  
363 rearrangements in the activation loop that prevent self-association of Lck<sup>K273R</sup>, or interaction  
364 with other proteins, thus, limiting confinement<sup>13</sup>. Relying on our results obtained for wtLck-  
365 PAmCherry, and thus assuming that a greater population of endogenous Lck was in the open,  
366 confined state in stimulated Jurkat cells compared to resting cells, Lck<sup>K273R, Y505F</sup>-PAmCherry  
367 was found to be highly confined in stimulated cells, supporting the hypothesis that Lck self-  
368 associated with other active Lck, therefore, promoting a more confined population. This is  
369 consistent with a previous report on Lck self-association in the open conformation<sup>43</sup>. Given

370 that Lck in the open conformation exhibited confined diffusion and hyperactivity<sup>13,14</sup>, it is  
371 highly likely that this state results in high local phosphorylation rates.

372 In conclusion, we provide evidence that the conformation of Lck was the main driver of Lck  
373 diffusion modes with open Lck causing confined diffusion and closed Lck enabling free  
374 diffusion. Individual Lck molecules can switch between confined and free diffusion in resting  
375 and stimulated T cells. This is consistent with a dual-state search strategy that enables Lck to  
376 scan large areas of the membrane in the closed state, but efficiently phosphorylate TCR-CD3  
377 complexes at numerous sites in the open state.

378



## 379 **Methods and Materials**

### 380 **Plasmids**

381 Lck and Lck10 were amplified by PCR and inserted within the Eco1 and Age1 restriction  
382 sites of a pAmCherry-N1 plasmid. Y394F, Y505F and K273R mutations were further  
383 introduced via site-directed mutagenesis.

### 384 **Sample Preparation**

385 Jurkat cells were cultured in RPMI medium (Gibco) containing phenol-red and supplemented  
386 with 10% (vol/vol) FBS, 2 mM L-glutamine (Invitrogen), 1 mM penicillin (Invitrogen) and 1  
387 mM streptomycin (Invitrogen). Cell cultures were passaged normally every ~48 hours, when  
388 the cell count reached  $\sim 8 \times 10^5$  viable cells per ml. The cells were cultured for at least 1 week  
389 (3-4 passages) after thawing prior to transfection and imaging. No cells were used after  
390 passage 20.

391 Cells were transfected by electroporation (Neon; Invitrogen); briefly, cells were collected  
392 before reaching a cell density of  $8 \times 10^5$  cell/ml and while  $\geq 90\%$  viable. The cells were washed  
393 twice with 1x PBS in 37°C and resuspended in the resuspension buffer (R-buffer) provided  
394 with the Neon kit. Three pulses of 1325 V with 10 ms duration were applied. The cells were  
395 allowed to recover in clear RPMI 1640 medium (Gibco) supplemented with 20% HI-FBS for  
396 overnight. Prior to imaging, fresh warm (37°C) media with 40 mM HEPES, pH 7.4 was  
397 added to achieve a final concentration of 20 mM HEPES.

398 1.5H coverslips (Marienfeld-Superior) were waterbath-sonicated in four 30-minutes stages: 1  
399 M KOH, Acetone, EtOH and ultra-pure (18 M $\Omega$ ) water. The coverslips were then allowed to  
400 adsorb 0.01% PLL (Sigma) in ultra-pure water for 15 minutes. Excess solution was later  
401 aspirated and the coverslips were baked-dry in 60 °C for 1 hour. Finally, after cooling-down,

402 the coverslips were coated with either 0.01 mg/ml anti-CD3 (OKT3; eBioscience) and 0.01  
403 mg/ml anti-CD28 (CD28.2; Invitrogen) for stimulating conditions or 0.01 mg/ml  $\alpha$ CD90 for  
404 (Thy-1; eBioscience) for resting conditions and let rest in 4°C overnight before imaging. The  
405 coverslips were washed 3 times with phosphate buffer saline (PBS) pre-warmed to 37°C  
406 before the cells were transferred onto them to interact with the antibodies. For live-cell  
407 experiments, imaging took place ~5 minutes after cell-transfer, or fixed with 4%  
408 paraformaldehyde (P6148; Sigma) in 37°C, followed by 3 washing cycles with PBS for  
409 fixed-cell imaging.

#### 410 **Imaging**

411 For each sptPALM experiment 10,000 frames were acquired in a ~50 frames per second (18  
412 ms exposure time) rate on a total internal reflection fluorescence (TIRF) microscope  
413 (ELYRA, Zeiss) in 37 °C using a 100× oil immersion objective (N.A. = 1.46) and a 67.5°  
414 incident beam angle. PAmCherry fused to Lck variants were continuously photoactivated  
415 using a 405 nm laser radiation tuned to 0.5-5  $\mu$ W (interchangeable during acquisition to  
416 maintain a low density) and continuously excited with a 561 nm laser tuned to 2.5 mW. Point  
417 density was monitored by using ZEN (Zeiss) online-processing tool.

418

#### 419 **Data Analysis**

420 All accumulated data are comprised of three biologically-independent experiments, i.e. each  
421 mutant was imaged in two or more cells (in one of the three repetitions, where a repetition  
422 relates to a different transfection) in each cell-activation state (stimulated or resting). We used  
423 Diatrack<sup>53</sup> for fitting the point spread functions (PSFs) to a Gaussian with a 1.75 pixel width  
424 (1 pixel  $\approx$  0.097 nm) and then to track the particles by setting the search radius to 10 pixels.

425 The data was later analyzed by a custom MATLAB (Mathworks) adaptation of the trajectory  
426 analysis part of a previously published multi-target tracing (MTT) code<sup>32</sup>. Immobile particles  
427 (RMSD < 2 pixels) and trajectories shorter than 15 frames were excluded from analysis.  
428 Stages of confined and free diffusion were detected according to equation 1, with  $D_{\text{free}} = 2.15$   
429  $\mu\text{m}^2/\text{sec}$  (Fig. S2b, bottom),  $W = 4$  and  $t_w$  was the sum of the exposure time and the CCD  
430 reading time (~19.7 ms). To detect time spent in confinement, each sequence was segmented  
431 to non-overlapping windows of 5 frames and in each block of 5 frames, the ratio of  
432 confined:total particles was calculated. Each value of one 5 frames-window is a count in the  
433 histogram. All data processing and statistical analyses were performed in MATLAB.

#### 434 **Statistical Tests**

435 To compare between two populations of confinement fractions, that do not normally  
436 distribute, we used the Mann-Whitney U test, while the Kruskal-Wellis test was used for  
437 multiple datasets followed by a bonferroni post-hoc test. \*\*\*\* and n.s. indicate  $p \leq 0.00001$   
438 and  $p > 0.01$ , respectively. Ranges around median and mean values in supplementary text are  
439 the 95% confidence intervals calculated from bootstrapping the data by sampling 10,000  
440 times.

441

442

443

444

445

446

447

448

449

450 **Supplementary Materials**

451 **Fig.S1** Relationship between Lck diffusion coefficient and confinement

452 **Fig.S2** Diffusion coefficients histograms of wtLck, Lck10, LckY505F, LckY394F,  
453 LckK273R and LckK273R, Y505F in stimulated and resting Jurkat cells

454 **Fig.S3** Illustration of confinement ratio analysis

455 **Fig.S4** Comparison of confinement analysis result

456 **Fig.S5** Comparison of confinement analysis result of wtLck-PAmCherry, LckK273R-  
457 PAmCherry and LckK273R, Y505F-PAmCherry in stimulated and resting cells

458 **Movie S1**

459 **Movie S2**

460 **Movie S3**

461 **Movie S4**

462 **Movie S5**

463

464

465

466

467

468 **References and Notes:**

- 469 1 Klammt, C. & Lillemeier, B. F. How membrane structures control T cell signaling. *Front*  
470 *Immunol* **3**, 291, doi:10.3389/fimmu.2012.00291 (2012).
- 471 2 Guy, C. S. & Vignali, D. A. Organization of proximal signal initiation at the TCR:CD3 complex.  
472 *Immunol Rev* **232**, 7-21, doi:10.1111/j.1600-065X.2009.00843.x (2009).
- 473 3 Dustin, M. L. The immunological synapse. *Cancer Immunol Res* **2**, 1023-1033,  
474 doi:10.1158/2326-6066.CIR-14-0161 (2014).
- 475 4 Carreno, L. J. *et al.* T-cell antagonism by short half-life pMHC ligands can be mediated by an  
476 efficient trapping of T-cell polarization toward the APC. *Proc Natl Acad Sci U S A* **107**, 210-  
477 215, doi:10.1073/pnas.0911258107 (2010).
- 478 5 van der Merwe, P. A., Zhang, H. & Cordoba, S. P. Why do some T cell receptor cytoplasmic  
479 domains associate with the plasma membrane? *Front Immunol* **3**, 29,  
480 doi:10.3389/fimmu.2012.00029 (2012).
- 481 6 Rossy, J., Williamson, D. J. & Gaus, K. How does the kinase Lck phosphorylate the T cell  
482 receptor? Spatial organization as a regulatory mechanism. *Front Immunol* **3**, 167,  
483 doi:10.3389/fimmu.2012.00167 (2012).
- 484 7 Weiss, A. T cell antigen receptor signal transduction: a tale of tails and cytoplasmic protein-  
485 tyrosine kinases. *Cell* **73**, 209-212 (1993).
- 486 8 Kabouridis, P. S., Magee, A. I. & Ley, S. C. S-acylation of LCK protein tyrosine kinase is  
487 essential for its signalling function in T lymphocytes. *EMBO J* **16**, 4983-4998,  
488 doi:10.1093/emboj/16.16.4983 (1997).
- 489 9 Yurchak, L. K. & Sefton, B. M. Palmitoylation of either Cys-3 or Cys-5 is required for the  
490 biological activity of the Lck tyrosine protein kinase. *Mol Cell Biol* **15**, 6914-6922 (1995).
- 491 10 Li, L. *et al.* Ionic CD3-Lck interaction regulates the initiation of T-cell receptor signaling. *Proc*  
492 *Natl Acad Sci U S A* **114**, E5891-E5899, doi:10.1073/pnas.1701990114 (2017).
- 493 11 Briese, L. & Willbold, D. Structure determination of human Lck unique and SH3 domains by  
494 nuclear magnetic resonance spectroscopy. *BMC Structural Biology* **3**, 3, doi:10.1186/1472-  
495 6807-3-3 (2003).
- 496 12 Casas, J. *et al.* Ligand-engaged TCR is triggered by Lck not associated with CD8 coreceptor.  
497 *Nature Communications* **5**, 5624, doi:10.1038/ncomms6624 (2014).
- 498 13 Liaunardy-Jopeace, A., Murton, B. L., Mahesh, M., Chin, J. W. & James, J. R. Encoding optical  
499 control in LCK kinase to quantitatively investigate its activity in live cells. *Nat Struct Mol Biol*  
500 **24**, 1155-1163, doi:10.1038/nsmb.3492 (2017).
- 501 14 Hui, E. & Vale, R. D. In vitro membrane reconstitution of the T-cell receptor proximal  
502 signaling network. *Nat Struct Mol Biol* **21**, 133-142, doi:10.1038/nsmb.2762 (2014).
- 503 15 Nika, K. *et al.* A weak Lck tail bite is necessary for Lck function in T cell antigen receptor  
504 signaling. *J Biol Chem* **282**, 36000-36009, doi:10.1074/jbc.M702779200 (2007).
- 505 16 Gervais, F. G., Chow, L. M., Lee, J. M., Branton, P. E. & Veillette, A. The SH2 domain is  
506 required for stable phosphorylation of p56lck at tyrosine 505, the negative regulatory site.  
507 *Mol Cell Biol* **13**, 7112-7121 (1993).
- 508 17 Davis, S. J. & van der Merwe, P. A. Lck and the nature of the T cell receptor trigger. *Trends in*  
509 *Immunology* **32**, 1-5, doi:https://doi.org/10.1016/j.it.2010.11.003 (2011).
- 510 18 Douglass, A. D. & Vale, R. D. Single-molecule microscopy reveals plasma membrane  
511 microdomains created by protein-protein networks that exclude or trap signaling molecules  
512 in T cells. *Cell* **121**, 937-950, doi:10.1016/j.cell.2005.04.009 (2005).
- 513 19 Philipsen, L. *et al.* De novo phosphorylation and conformational opening of the tyrosine  
514 kinase Lck act in concert to initiate T cell receptor signaling. *Sci Signal* **10**,  
515 doi:10.1126/scisignal.aaf4736 (2017).

- 516 20 Stirnweiss, A. *et al.* T cell activation results in conformational changes in the Src family kinase  
517 Lck to induce its activation. *Sci Signal* **6**, ra13, doi:10.1126/scisignal.2003607 (2013).
- 518 21 Rossy, J., Owen, D. M., Williamson, D. J., Yang, Z. & Gaus, K. Conformational states of the  
519 kinase Lck regulate clustering in early T cell signaling. *Nat Immunol* **14**, 82-89,  
520 doi:10.1038/ni.2488 (2013).
- 521 22 Nika, K. *et al.* Constitutively active Lck kinase in T cells drives antigen receptor signal  
522 transduction. *Immunity* **32**, 766-777, doi:10.1016/j.immuni.2010.05.011 (2010).
- 523 23 Ballek, O., Valecka, J., Manning, J. & Philipp, D. The pool of preactivated Lck in the initiation of  
524 T-cell signaling: a critical re-evaluation of the Lck standby model. *Immunol Cell Biol* **93**, 384-  
525 395, doi:10.1038/icb.2014.100 (2015).
- 526 24 Paster, W. *et al.* Genetically encoded Förster resonance energy transfer sensors for the  
527 conformation of the Src family kinase Lck. *J Immunol* **182**, 2160-2167,  
528 doi:10.4049/jimmunol.0802639 (2009).
- 529 25 Moogk, D. *et al.* Constitutive Lck Activity Drives Sensitivity Differences between CD8+  
530 Memory T Cell Subsets. *J Immunol* **197**, 644-654, doi:10.4049/jimmunol.1600178 (2016).
- 531 26 Bénichou, O., Loverdo, C., Moreau, M. & Voituriez, R. Intermittent search strategies. *Reviews*  
532 *of Modern Physics* **83**, 81-129 (2011).
- 533 27 Ike, H. *et al.* Mechanism of Lck recruitment to the T-cell receptor cluster as studied by single-  
534 molecule-fluorescence video imaging. *Chemphyschem* **4**, 620-626,  
535 doi:10.1002/cphc.200300670 (2003).
- 536 28 Ballek, O. *et al.* TCR Triggering Induces the Formation of Lck-RACK1-Actinin-1 Multiprotein  
537 Network Affecting Lck Redistribution. *Front Immunol* **7**, 449, doi:10.3389/fimmu.2016.00449  
538 (2016).
- 539 29 Fernandes, R. A. *et al.* Constraining CD45 exclusion at close-contacts provides a mechanism  
540 for discriminatory T-cell receptor signalling. *bioRxiv*, doi:10.1101/109785 (2017).
- 541 30 Manley, S. *et al.* High-density mapping of single-molecule trajectories with photoactivated  
542 localization microscopy. *Nat Methods* **5**, 155-157, doi:10.1038/nmeth.1176 (2008).
- 543 31 Subach, F. V. *et al.* Photoactivatable mCherry for high-resolution two-color fluorescence  
544 microscopy. *Nat Methods* **6**, 153-159, doi:10.1038/nmeth.1298 (2009).
- 545 32 Serge, A., Bertaux, N., Rigneault, H. & Marguet, D. Dynamic multiple-target tracing to probe  
546 spatiotemporal cartography of cell membranes. *Nat Methods* **5**, 687-694,  
547 doi:10.1038/nmeth.1233 (2008).
- 548 33 Ma, Y. *et al.* An intermolecular FRET sensor detects the dynamics of T cell receptor  
549 clustering. *Nat Commun* **8**, 15100, doi:10.1038/ncomms15100 (2017).
- 550 34 Gaus, K., Chklovskaya, E., Fazekas de St Groth, B., Jessup, W. & Harder, T. Condensation of  
551 the plasma membrane at the site of T lymphocyte activation. *J Cell Biol* **171**, 121-131,  
552 doi:10.1083/jcb.200505047 (2005).
- 553 35 Ledbetter, J. A. *et al.* CD4, CD8 and the role of CD45 in T-cell activation. *Current Opinion in*  
554 *Immunology* **5**, 334-340, doi:https://doi.org/10.1016/0952-7915(93)90050-3 (1993).
- 555 36 Simeoni, L. Lck activation: puzzling the pieces together. *Oncotarget* **8**, 102761-102762,  
556 doi:10.18632/oncotarget.22309 (2017).
- 557 37 Laham, L. E., Mukhopadhyay, N. & Roberts, T. M. The activation loop in Lck regulates  
558 oncogenic potential by inhibiting basal kinase activity and restricting substrate specificity.  
559 *Oncogene* **19**, 3961-3970, doi:10.1038/sj.onc.1203738 (2000).
- 560 38 Chakraborty, A. K. & Weiss, A. Insights into the initiation of TCR signaling. *Nat Immunol* **15**,  
561 798-807, doi:10.1038/ni.2940 (2014).
- 562 39 D'Oro, U., Sakaguchi, K., Appella, E. & Ashwell, J. D. Mutational analysis of Lck in CD45-  
563 negative T cells: dominant role of tyrosine 394 phosphorylation in kinase activity. *Mol Cell*  
564 *Biol* **16**, 4996-5003 (1996).
- 565 40 Courtney, A. H. *et al.* A Phosphosite within the SH2 Domain of Lck Regulates Its Activation by  
566 CD45. *Mol Cell Biol* **67**, 498-511 e496, doi:10.1016/j.molcel.2017.06.024 (2017).

- 567 41 Dobbins, J. *et al.* Binding of the cytoplasmic domain of CD28 to the plasma membrane  
568 inhibits Lck recruitment and signaling. *Sci Signal* **9**, ra75, doi:10.1126/scisignal.aaf0626  
569 (2016).
- 570 42 Philipp, D. *et al.* Lck-dependent Fyn activation requires C terminus-dependent targeting of  
571 kinase-active Lck to lipid rafts. *J Biol Chem* **283**, 26409-26422, doi:10.1074/jbc.M710372200  
572 (2008).
- 573 43 Kapoor-Kaushik, N. *et al.* Distinct Mechanisms Regulate Lck Spatial Organization in Activated  
574 T Cells. *Front Immunol* **7**, 83, doi:10.3389/fimmu.2016.00083 (2016).
- 575 44 Sheng, R. *et al.* Lipids Regulate Lck Protein Activity through Their Interactions with the Lck  
576 Src Homology 2 Domain. *J Biol Chem* **291**, 17639-17650, doi:10.1074/jbc.M116.720284  
577 (2016).
- 578 45 Gorfe, A. A., Lu, B., Yu, Z. & McCammon, J. A. Enzymatic activity versus structural dynamics:  
579 the case of acetylcholinesterase tetramer. *Biophys J* **97**, 897-905,  
580 doi:10.1016/j.bpj.2009.05.033 (2009).
- 581 46 Merlino, A. *et al.* The importance of dynamic effects on the enzyme activity: X-ray structure  
582 and molecular dynamics of onconase mutants. *J Biol Chem* **280**, 17953-17960,  
583 doi:10.1074/jbc.M501339200 (2005).
- 584 47 Hanson, J. A. *et al.* Illuminating the mechanistic roles of enzyme conformational dynamics.  
585 *Proc Natl Acad Sci U S A* **104**, 18055-18060, doi:10.1073/pnas.0708600104 (2007).
- 586 48 Baumgart, F. *et al.* Varying label density allows artifact-free analysis of membrane-protein  
587 nanoclusters. *Nat Methods* **13**, 661-664, doi:10.1038/nmeth.3897 (2016).
- 588 49 Jordan, S. & Rodgers, W. T cell glycolipid-enriched membrane domains are constitutively  
589 assembled as membrane patches that translocate to immune synapses. *J Immunol* **171**, 78-  
590 87 (2003).
- 591 50 Ventimiglia, L. N. & Alonso, M. A. The role of membrane rafts in Lck transport, regulation  
592 and signalling in T-cells. *Biochem J* **454**, 169-179, doi:10.1042/BJ20130468 (2013).
- 593 51 Ilangumaran, S., Arni, S., van Echten-Deckert, G., Borisch, B. & Hoessli, D. C. Microdomain-  
594 dependent regulation of Lck and Fyn protein-tyrosine kinases in T lymphocyte plasma  
595 membranes. *Mol Biol Cell* **10**, 891-905 (1999).
- 596 52 Philipp, D., Ballek, O. & Manning, J. Lck, Membrane Microdomains, and TCR Triggering  
597 Machinery: Defining the New Rules of Engagement. *Front Immunol* **3**, 155,  
598 doi:10.3389/fimmu.2012.00155 (2012).
- 599 53 Vallotton, P. & Olivier, S. Tri-track: free software for large-scale particle tracking. *Microsc*  
600 *Microanal* **19**, 451-460, doi:10.1017/S1431927612014328 (2013).

601 **Funding:** K.G. acknowledges funding from the ARC Centre of Excellence in Advanced  
602 Molecular Imaging (CE140100011), Australian Research Council (LP140100967 and  
603 DP130100269) and National Health and Medical Research Council of Australia (1059278  
604 and 1037320).

605 **Author Contributions:** GH performed experiments, modified analysis, analyzed data, and  
606 wrote manuscript. EP established analysis and helped write the manuscript. ZY was  
607 responsible for the generation of Lck constructs. DJN and JG aided in writing and drafting of

608 the manuscript. JR provided guidance with experiments. KG designed the project,

609 interpreted the data and wrote the manuscript.

610 **Competing interests:** The authors declare no competing interests.

611



612 **Figures:**

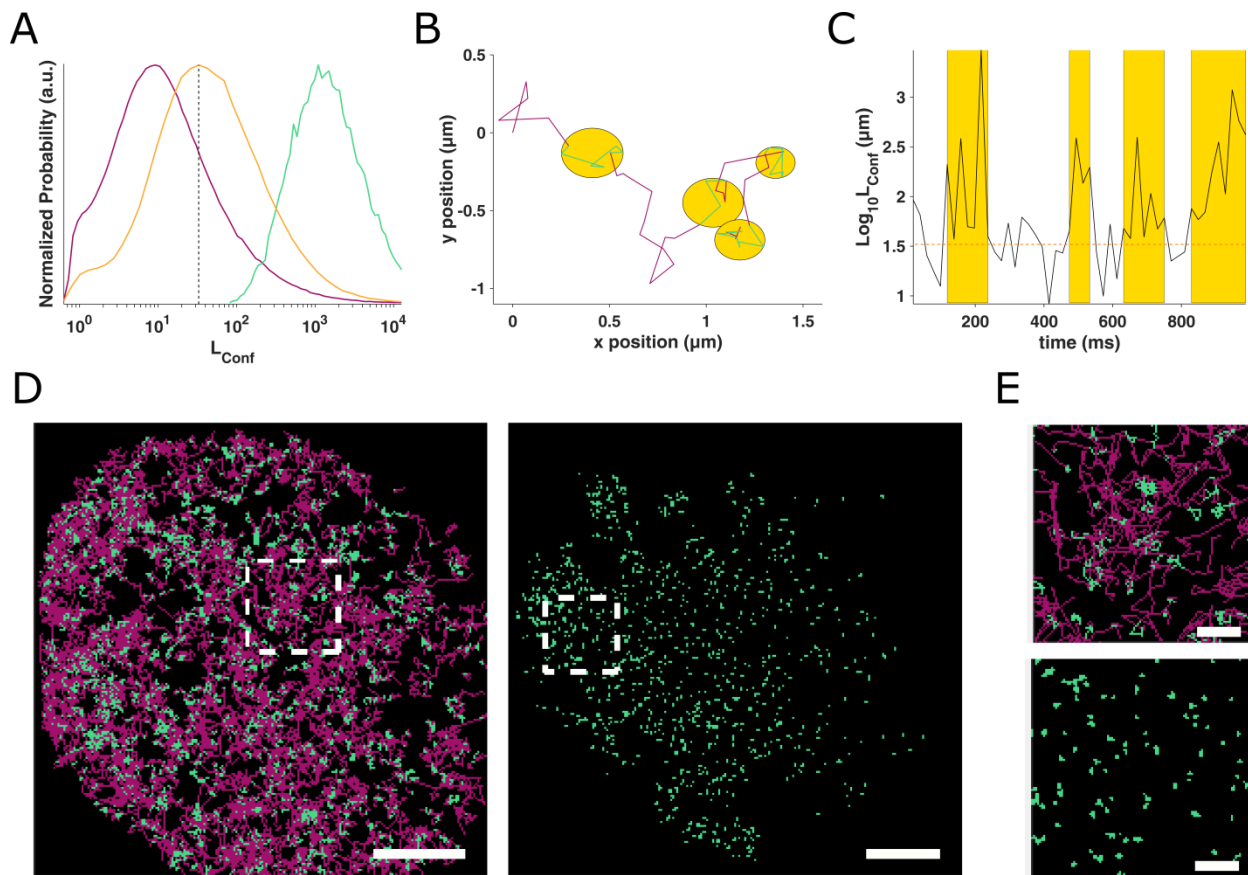

613

614 **Fig.1 wtLck switches between free and confined states.** (A)  $L_{Conf}$  acquired for Lck10-  
615 PAmCherry in resting Jurkat cells (purple), wtLck-PAmCherry in stimulated Jurkat cells  
616 (orange) and wtLck-PAmCherry in fixed cells (cyan), normalized to peak value. The dashed  
617 vertical line marks the threshold where a particle was to be considered confined, i.e., if it had  
618 three or more consecutive steps with an  $L_{Conf}$  value greater than that threshold. (B) An  
619 experimental trajectory decomposed to free (magenta) and confined (cyan) states, with the  
620 confinements highlighted in yellow circles. (C) Time evolution of  $L_{Conf}$  values for the  
621 trajectory in (B) with the threshold marked with an orange dashed line and the confined  
622 periods with a yellow shade. (D) Trajectory decomposition maps of wtLck-PAmCherry in a  
623 stimulated live cells (left) and fixed Jurkat cells (right) Free periods are colored magenta,

624 whereas confined periods are colored cyan. Scale bar = 5  $\mu\text{m}$ . **(E)** 5  $\mu\text{m}$  by 5  $\mu\text{m}$  zoomed-in

625 regions of interest in **(D)** (top – live, bottom - fixed). Scale bar = 1  $\mu\text{m}$ .

626

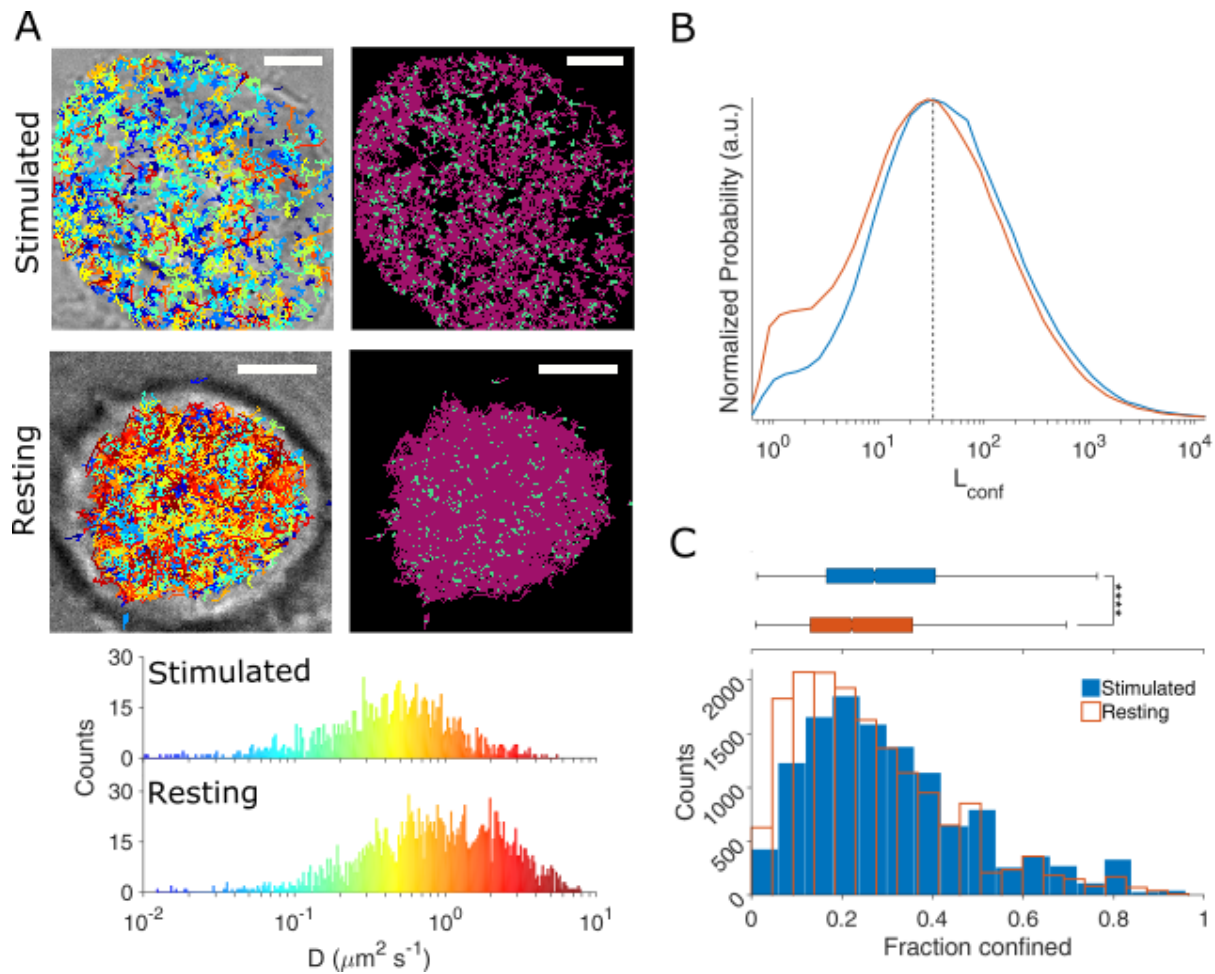

627

628

629 **Fig.2 wtLck-PAMCherry is more confined in stimulated cells.** (A) Representative

630 stimulated and resting Jurkat E6-1 cells expressing wtLck-PAMCherry. The left panels show

631 bright field images of the cells with detected trajectories overlaid, color-coded according to

632 their initial diffusion. The right panels show the free (magenta) and confined (cyan) modes of

633 diffusion. Scale bar = 5  $\mu\text{m}$ . Bottom: diffusions histogram corresponding to the cells above,

634 sharing mutual color-coding. (B)  $L_{\text{Conf}}$  histograms for wtLck-PAMCherry in resting (orange)

635 and stimulated (blue) cells. (C) Histograms of the fraction of confined wtLck-PAMCherry

636 molecules obtained for 13 stimulated (blue) and 17 resting (orange) Jurkat cells. Box plot

637 shows the median. Notch 95% confidence interval, box edges first and third quartile, lines

638 Tukey's fences, \*\*\*\*  $p \leq 0.00001$ .

639

640

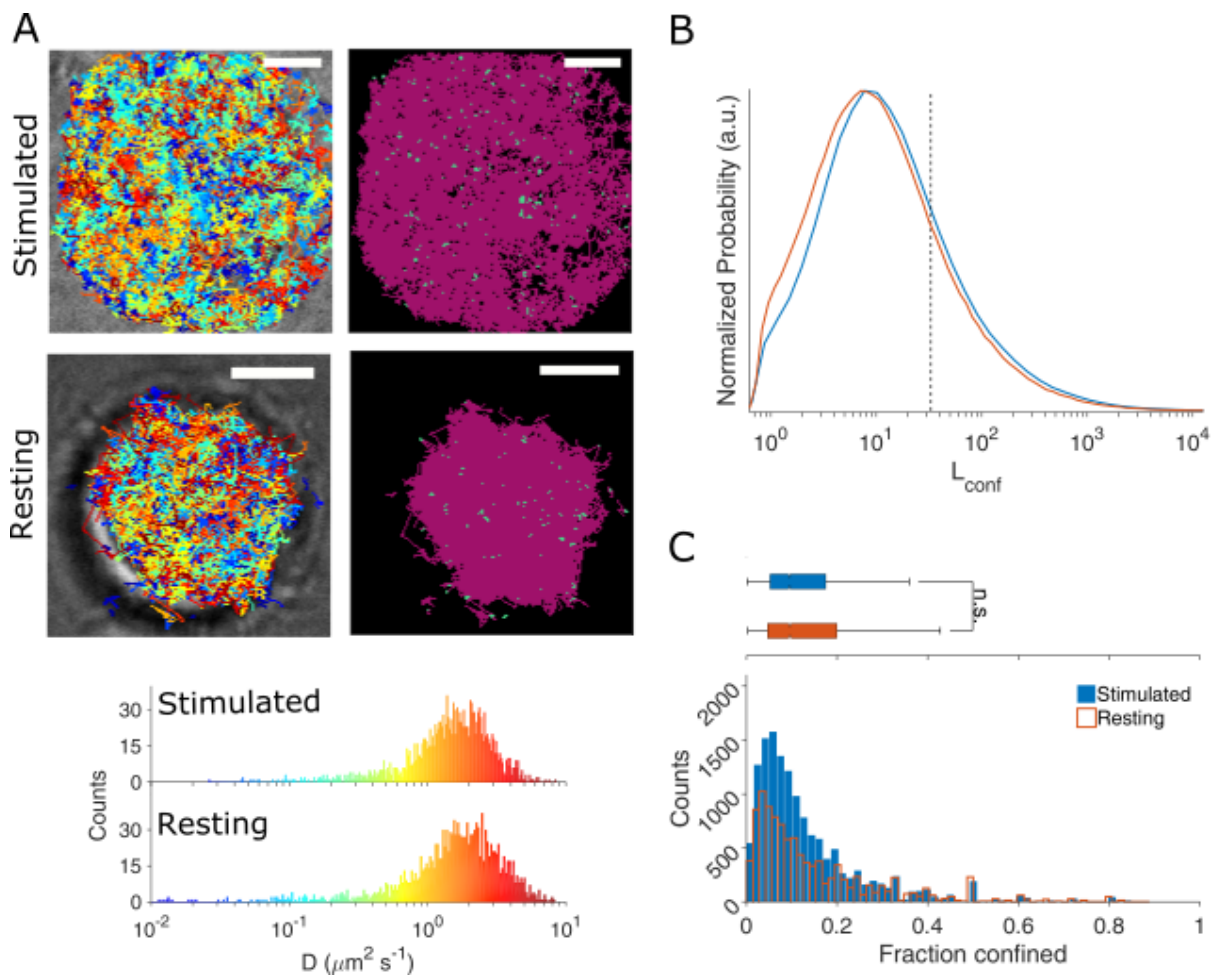

641

642

643 **Fig. 3 Lck10-PAmCherry demonstrates free-diffusion in resting and stimulated cells.**

644 (A) Representative stimulated and resting Jurkat E6-1 cells expressing Lck10-PAmCherry.

645 The left panels show bright field images of the cells with detected trajectories overlaid, color-

646 coded according to their initial diffusion. The right panels show the free (magenta) and

647 confined (cyan) modes of diffusion. Scale bar = 5  $\mu\text{m}$ . Bottom: diffusions histogram

648 corresponding to the cells above, sharing mutual color-coding. (B)  $L_{\text{Conf}}$  histograms for

649 Lck10-PAmCherry in resting (orange) and stimulated (blue) cells. (C) Histograms of the

650 fraction of confined Lck10-PAmCherry molecules obtained for 19 stimulated (blue) and 15

651 resting (orange) Jurkat cells. Box plot shows the median. Notch 95% confidence interval, box

652 edges first and third quartile, lines Tukey's fences, n.s.  $p > 0.01$ .

653

654

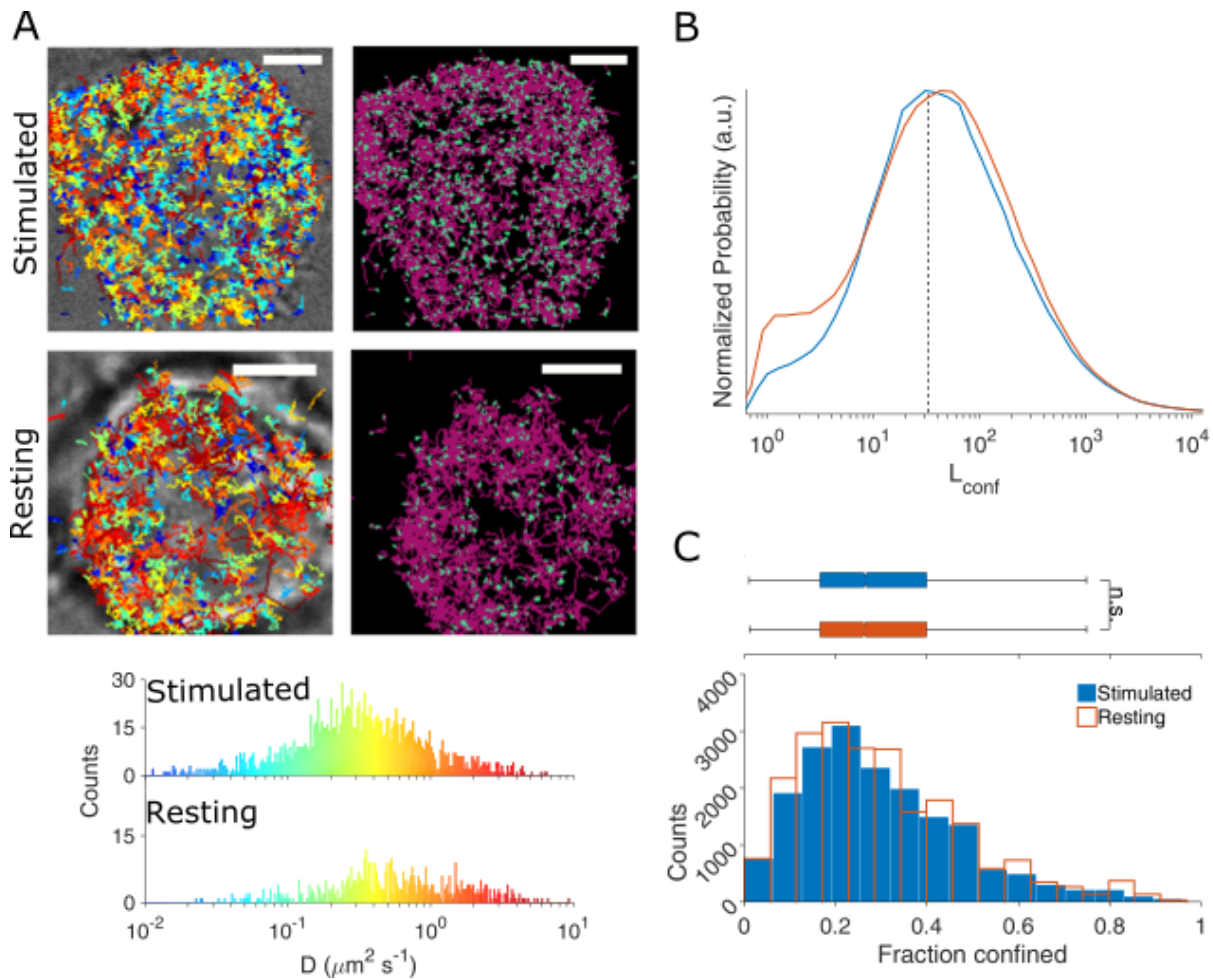

655

656

657 **Fig. 4** Lck<sup>Y505F</sup>-PAmCherry is equally confined in stimulated and resting cells. (A)

658 Representative stimulated and resting Jurkat E6-1 cells expressing Lck<sup>Y505F</sup>-PAmCherry. The

659 left panels show bright field images of the cells with detected trajectories overlaid, color-

660 coded according to their initial diffusion. The right panels show the free (magenta) and

661 confined (cyan) modes of diffusion. Scale bar = 5  $\mu\text{m}$ . Bottom: diffusions histogram

662 corresponding to the cells above, sharing mutual color-coding. (B) L<sub>Conf</sub> histograms for

663 Lck<sup>Y505F</sup>-PAmCherry in resting (orange) and stimulated (blue) cells. (C) Histograms of the

664 fraction of confined Lck<sup>Y505F</sup>-PAmCherry molecules obtained for 14 stimulated (blue) and 18



665 resting (orange) Jurkat cells. Box plot shows the median. Notch 95% confidence interval, box  
666 edges first and third quartile, lines Tukey's fences, n.s.  $p > 0.01$ .

667

668

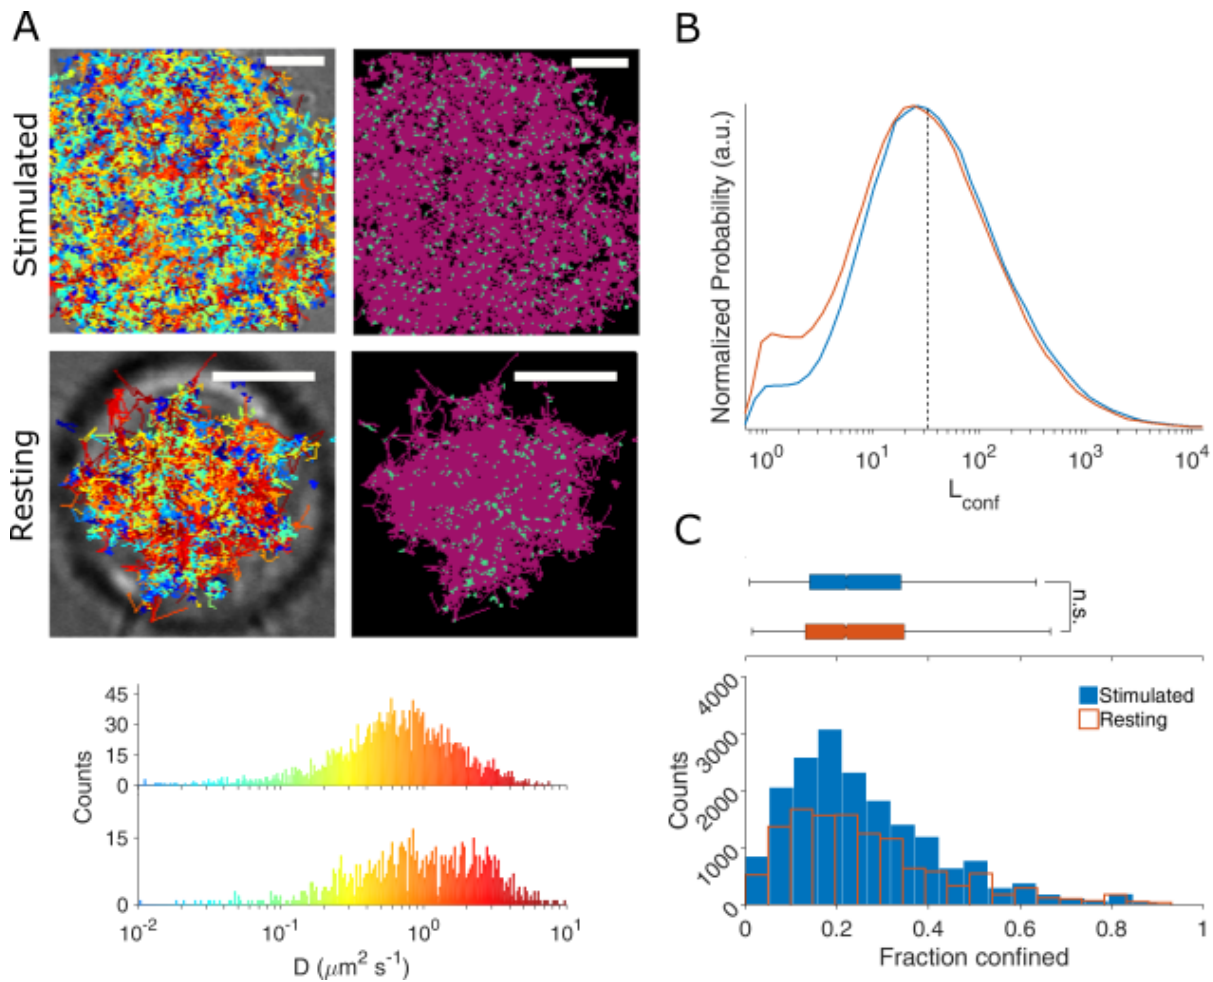

669

670

671 **Fig. 5**  $\text{Lck}^{\text{Y394F}}$ -PAmCherry is equally confined in stimulated and resting cells. (A)

672 Representative stimulated and resting Jurkat E6-1 cells expressing  $\text{Lck}^{\text{Y394F}}$ -PAmCherry. The

673 left panels show bright field images of the cells with detected trajectories overlaid, color-

674 coded according to their initial diffusion. The right panels show the free (magenta) and

675 confined (cyan) modes of diffusion. Scale bar = 5  $\mu\text{m}$ . Bottom: diffusions histogram

676 corresponding to the cells above, sharing mutual color-coding. (B)  $L_{\text{Conf}}$  histograms for

677  $\text{Lck}^{\text{Y394F}}$ -PAmCherry in resting (orange) and stimulated (blue) cells. (C) Histograms of the

678 fraction of confined Lck<sup>Y394F</sup>-PAmCherry molecules obtained for 16 stimulated (blue) and 14  
679 resting (orange) Jurkat cells. Box plot shows the median. Notch 95% confidence interval, box  
680 edges first and third quartile, lines Tukey's fences, n.s.  $p > 0.01$ .

681

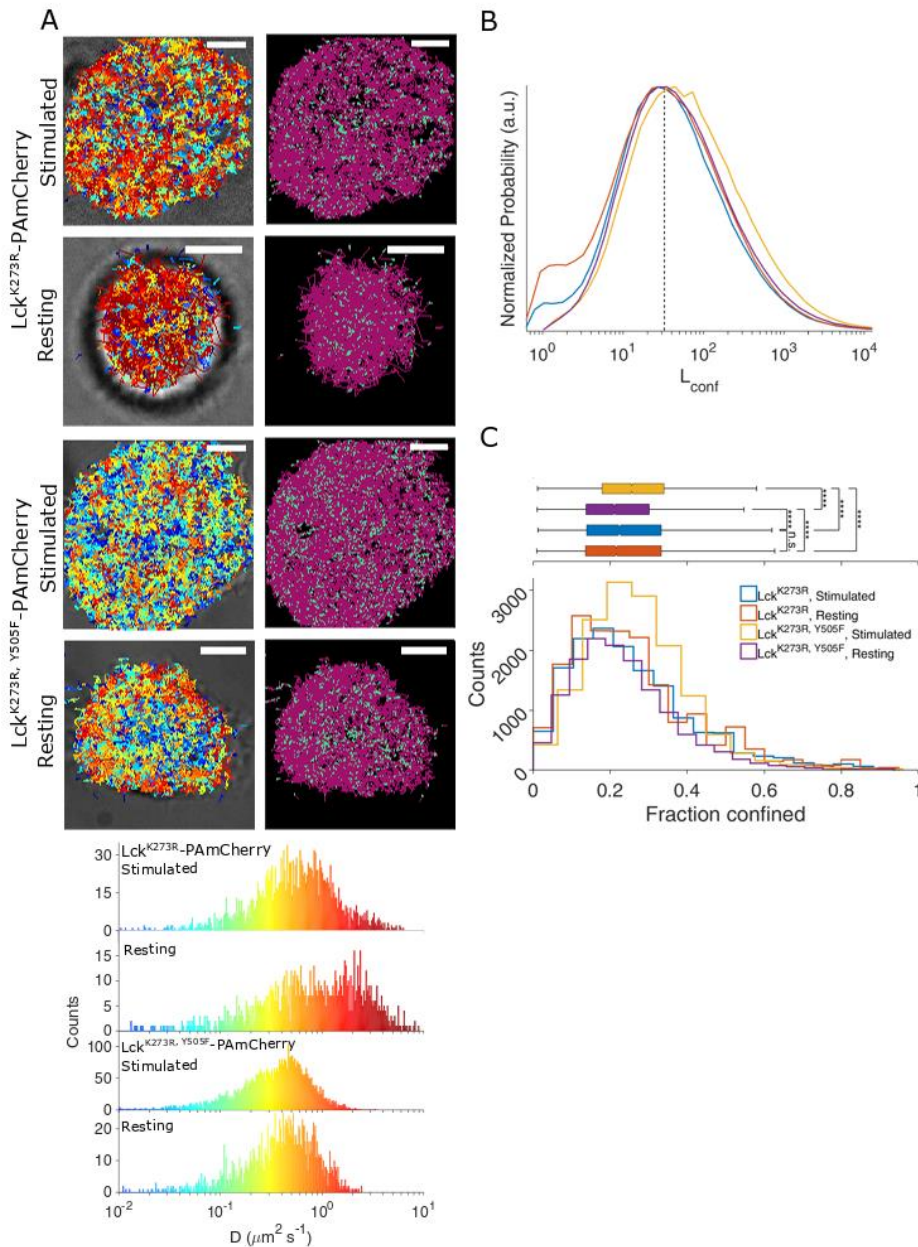

682  
 683 **Fig. 6 Confinement analyses for  $Lck^{K273R}$ -PAMCherry and  $Lck^{K273R, Y505F}$ -PAMCherry**  
 684 **in stimulated and resting cells. (A)** Representative stimulated and resting Jurkat E6-1 cells  
 685 expressing  $Lck^{K273R}$ -PAMCherry and  $Lck^{K273R, Y505F}$ -PAMCherry. The left panels show bright  
 686 field images of the cells with detected trajectories overlaid, color-coded according to their  
 687 initial diffusion. The right panels show the free (magenta) and confined (cyan) modes of  
 688 diffusion. Scale bar = 5  $\mu\text{m}$ . Bottom: diffusions histogram corresponding to the cells above,  
 689 sharing mutual color-coding. **(B)**  $L_{\text{Conf}}$  histograms for  $Lck^{K273R}$ -PAMCherry and  $Lck^{K273R, Y505F}$ -  
 690  $Lck^{K273R, Y505F}$ -PAMCherry in and stimulated cells. (orange, blue, purple and yellow, respectively). **(C)**



691 Histograms of the fraction of confined Lck<sup>K273R</sup>-PAmCherry molecules obtained for 12  
692 stimulated (blue) and 14 resting (orange) Jurkat cells and histograms of the fraction of  
693 confined Lck<sup>K273R, Y505F</sup>-PAmCherry obtained for 8 stimulated (yellow) and 8 resting (purple)  
694 Jurkat cells. Box plot shows the median. Notch 95% confidence interval, box edges first and  
695 third quartile, lines Tukey's fences, , \*\*\*\* p $\leq$ 0.00001, n.s. p $>$ 0.01.  
696

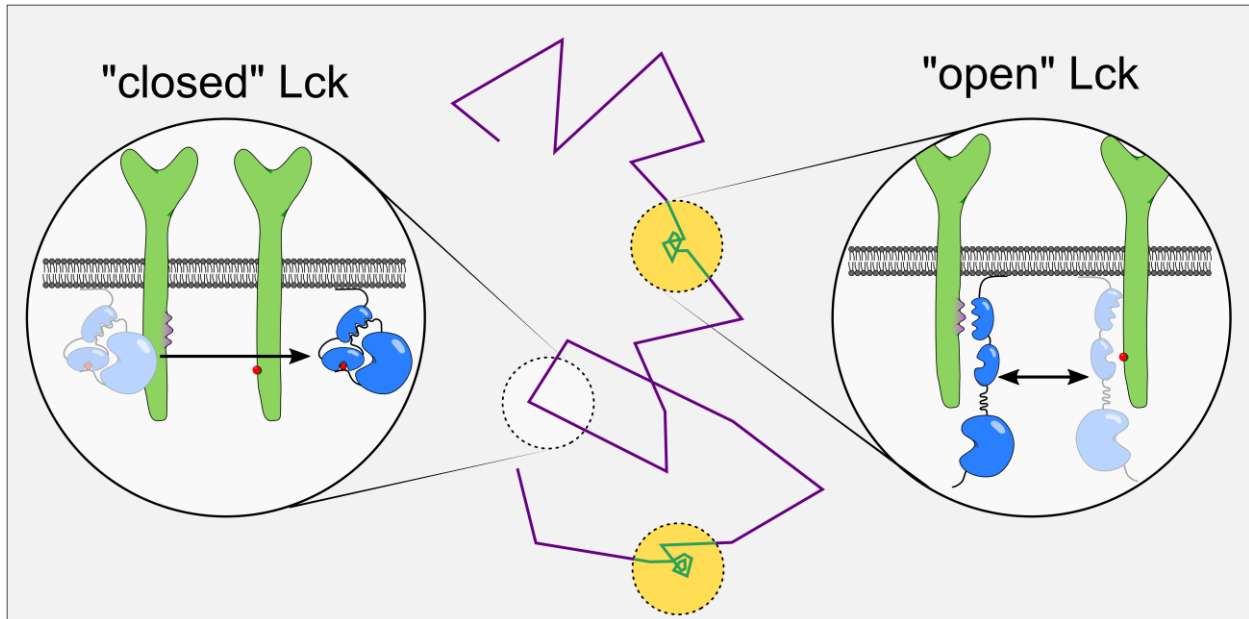

697

698

699 **Fig. 7 Two-stage diffusion model of Lck that combines an efficient search strategy with**

700 **a high phosphorylation rates of substrates.** Lck (illustrated in blue) exists in two main

701 conformations: a closed conformation characterized by low catalytic activity and mediated by

702 intramolecular interactions; and an open conformation characterized by high catalytic activity

703 and free SH2 and SH3 domains. Our data propose that the closed conformation diffuses

704 unimpeded (purple line), whereas the open conformation interacts with other membrane

705 proteins (illustrated in green) via SH2 and SH3 domain mediated interactions and becomes

706 confined (yellow circles) through rapid rebinding (teal line). Free diffusion allows Lck to

707 scan large membrane areas while confinement in the open conformation enables high

708 substrate phosphorylation rates.

709
